# Supplementary material for: Demographics, Disease Characteristics, and Patient-Reported Outcomes Among Patients with Psoriasis Who Initiated Guselkumab in CorEvitas’ Psoriasis Registry
Source: Springer Nature journal article supplement (doi:10.1007/s13555-021-00637-2), 2021-11-25
Supplement: MOESM1 [file 19900856]

# **Demographics, Disease Characteristics, And Patient-Reported Outcomes Among Patients with Psoriasis Who Initiated Guselkumab in Corevitas' Psoriasis Registry**

Jessica A. Walsh<sup>1</sup>, Kristina Callis Duffin<sup>1</sup>, Abby S. Van Voorhees<sup>2</sup>, Soumya D. Chakravarty<sup>3,4</sup>, Timothy Fitzgerald<sup>3\*</sup>, Amanda Teeple<sup>3</sup>, Katelyn Rowland<sup>3</sup>, Jonathan Uy<sup>5</sup>, Robert R. McLean<sup>6</sup>, Wendi Malley<sup>6</sup>, Angel Cronin<sup>6</sup>, Joseph F. Merola<sup>7</sup>

<sup>1</sup>University of Utah, Salt Lake City, UT, USA; <sup>2</sup>Eastern Virginia Medical School, Norfolk, VA, USA; <sup>3</sup>Janssen Scientific Affairs LLC, Horsham, PA, USA; <sup>4</sup>Drexel University College of Medicine, Philadelphia, PA, USA; <sup>5</sup>Janssen Global Services LLC, Horsham, PA, USA; <sup>6</sup>CorEvitas LLC, Waltham, MA, USA; <sup>7</sup>Harvard Medical School, Brigham and Women's Hospital, Boston, MA, USA.

## **\*Corresponding Author:**

Timothy Fitzgerald  
Director, Immunology, Real World Value & Evidence  
Janssen Scientific Affairs LLC  
Horsham, PA 19044, USA  
Email: [TFitzg11@its.jnj.com](mailto:TFitzg11@its.jnj.com)  
Telephone: (267) 678-3875

**Table S1: Baseline demographics and disease characteristics of patients with psoriasis and concomitant rheumatologist-confirmed psoriatic arthritis who initiated guselkumab in CorEvitas' Psoriasis Registry by prior biologic use**

| Characteristics <sup>a</sup>          | Prior biologic use <sup>b</sup> (n) |                                | Standardized difference <sup>c</sup> |
|---------------------------------------|-------------------------------------|--------------------------------|--------------------------------------|
|                                       | Biologic-naïve (n = 10)             | Biologic-experienced (n = 103) |                                      |
| Age (years), mean (SD)                | 55.9 (10.6)                         | 51.7 (13.4)                    | <b>0.35</b>                          |
| Female, n (%)                         | 5 (50.0)                            | 59 (57.3)                      | <b>0.15</b>                          |
| White, n (%)                          | 7 (70.0)                            | 90 (87.4)                      | <b>0.43</b>                          |
| Private health insurance, n (%)       | 10 (100.0)                          | 83 (80.6)                      | <b>0.69</b>                          |
| Some college or more, n (%)           | 8 (80.0)                            | 74 (71.8)                      | <b>0.19</b>                          |
| Employed full time n, (%)             | 6 (60.0)                            | 56 (54.4)                      | <b>0.11</b>                          |
| Current smoker, n/N <sub>i</sub> (%)  | 2/9 (22.2)                          | 18/103 (17.5)                  | <b>0.12</b>                          |
| Body weight (kg), mean (SD)           | 100.8 (21.9)                        | 98.9 (24.4)                    | 0.09                                 |
| BMI >30 kg/m <sup>2</sup> , n (%)     | 6 (60.0)                            | 69 (67.0)                      | <b>0.15</b>                          |
| History of comorbidities, n (%)       |                                     |                                |                                      |
| Cancer <sup>d</sup>                   | 0 (0.0)                             | 7 (6.8)                        | <b>0.38</b>                          |
| Serious infections                    | 0 (0.0)                             | 10 (9.7)                       | <b>0.46</b>                          |
| Cardiovascular disease <sup>e</sup>   | 1 (10.0)                            | 5 (4.9)                        | <b>0.20</b>                          |
| Hypertension                          | 5 (50.0)                            | 26 (25.2)                      | <b>0.53</b>                          |
| Hyperlipidemia                        | 1 (10.0)                            | 14 (13.6)                      | <b>0.11</b>                          |
| Diabetes mellitus                     | 1 (10.0)                            | 8 (7.8)                        | 0.08                                 |
| Crohn's disease                       | 0 (0.0)                             | 1 (1.0)                        | <b>0.14</b>                          |
| Ulcerative colitis                    | 0 (0.0)                             | 1 (1.0)                        | <b>0.14</b>                          |
| Depression                            | 1 (10.0)                            | 13 (12.6)                      | 0.08                                 |
| Anxiety                               | 2 (20.0)                            | 15 (14.6)                      | <b>0.14</b>                          |
| BSA (%), mean (SD)                    | 14.5 (10.6)                         | 12.4 (16.4)                    | <b>0.15</b>                          |
| PASI (score: 0-72), mean (SD)         | 10.9 (6.2)                          | 8.3 (8.8)                      | <b>0.34</b>                          |
| IGA, mean (SD)                        | 3.2 (0.6)                           | 2.7 (1.1)                      | <b>0.55</b>                          |
| Psoriasis morphology                  |                                     |                                |                                      |
| Scalp                                 | 6 (60.0)                            | 46 (44.7)                      | <b>0.31</b>                          |
| Nail                                  | 2 (20.0)                            | 25 (24.3)                      | 0.10                                 |
| Palmoplantar                          | 2 (20.0)                            | 27 (26.2)                      | <b>0.15</b>                          |
| Genital                               | 4 (40.0)                            | 11 (10.7)                      | <b>0.72</b>                          |
| Psoriasis duration (years), mean (SD) | 23.0 (18.6)                         | 19.5 (13.3)                    | <b>0.22</b>                          |
| PsA duration (years), mean (SD)       | n = 10<br>15.3 (17.8)               | n = 94<br>10.9 (9.3)           | <b>0.31</b>                          |
| PEST score ≥3, n (%)                  | 5/10 (50.0)                         | 66/102 (64.7)                  | <b>0.30</b>                          |
| Concomitant therapy, n (%)            |                                     |                                |                                      |
| Systemic therapy <sup>f</sup>         | 1 (10.0)                            | 27 (26.2)                      | <b>0.43</b>                          |
| Topical agents                        | 7 (70.0)                            | 42 (40.8)                      | <b>0.62</b>                          |

<sup>a</sup> Item non-response was <1% for all cells, unless denominator is reported.

<sup>b</sup> Biologic medications included adalimumab, brodalumab, certolizumab pegol, etanercept, guselkumab, infliximab, ixekizumab, secukinumab, and ustekinumab.

<sup>c</sup> Meaningful differences (standardized difference >0.10) are bolded.

<sup>d</sup> Cancer includes lymphoma, lung, breast, skin (basal cell, squamous cell, melanoma), and any other cancers.

<sup>e</sup> Cardiovascular disease includes baseline history of any of the following: cardiac revascularization procedure, ventricular arrhythmia, cardiac arrest, myocardial infarction, acute coronary syndrome, unstable angina, coronary artery disease, and congestive heart failure; cerebrovascular disease includes baseline history of any of the following: stroke, TIA, peripheral vascular disease, peripheral arterial disease.

<sup>f</sup> Systemic therapy includes biologics listed above and the non-biologics apremilast, cyclosporine, acitretin, and methotrexate.

Abbreviations: BMI = body mass index; BSA = body surface area; IGA = Investigator's Global Assessment; PASI = Psoriasis Area Severity Index; PEST = Psoriasis Epidemiology Screening Tool; PsA = psoriatic arthritis; SD = standard deviation; TIA = transient ischemic attack.

**Table S2: Baseline patient-reported outcome measures for patients with psoriasis and concomitant rheumatologist-confirmed psoriatic arthritis who initiated guselkumab in CorEvitas' Psoriasis Registry by prior biologic use**

| Characteristics <sup>a</sup>                       | Prior biologic use <sup>b</sup> (n) |                                | Standardized difference <sup>c</sup> |
|----------------------------------------------------|-------------------------------------|--------------------------------|--------------------------------------|
|                                                    | Biologic-naïve (n = 10)             | Biologic-experienced (n = 103) |                                      |
| Overall patient-reported outcomes, mean (SD)       |                                     |                                |                                      |
| Overall itch/pruritus (VAS 0-100)                  | 77.0 (21.2)                         | 52.4 (35.4)                    | <b>0.84</b>                          |
| Overall fatigue (VAS 0-100)                        | 53.0 (25.7)                         | 48.9 (33.3)                    | <b>0.14</b>                          |
| Overall skin pain (VAS 0-100)                      | 50.0 (36.5)                         | 42.2 (35.8)                    | <b>0.22</b>                          |
| PGA (VAS 0-100)                                    | 62.9 (19.1)                         | 50.4 (29.9)                    | <b>0.50</b>                          |
| PsA patient-reported outcomes, n                   | n = 10                              | n = 99                         |                                      |
| Joint pain due to PsA (VAS 0-100), mean (SD)       | 55.5 (31.4)                         | 51.2 (32.1)                    | <b>0.13</b>                          |
| Wellness as a result of PsA (VAS 0-100), mean (SD) | 56.0 (28.2)                         | 46.5 (31.4)                    | <b>0.32</b>                          |
| WPAI, mean (SD)                                    |                                     |                                |                                      |
| Currently employed, n (%)                          | 7 (70.0)<br>n = 6                   | 65 (63.1)<br>n = 61            | <b>0.15</b>                          |
| % of work hours missed due to PsO                  | 6.7 (15.1)<br>n = 6                 | 6.8 (17.8)<br>n = 61           | 0.00                                 |
| % of impairment while working due to PsO           | 25.0 (21.2)<br>n = 6                | 19.2 (26.7)<br>n = 60          | <b>0.24</b>                          |
| % of work hours affected by PsO                    | 28.6 (25.9)<br>n = 10               | 21.3 (29.0)<br>n = 101         | <b>0.27</b>                          |
| % of daily activities impaired by PsO              | 37.0 (25.3)                         | 29.2 (31.0)                    | <b>0.28</b>                          |
| DLQI (score: 0-30), mean (SD)                      | n = 10<br>11.0 (4.7)                | n = 101<br>9.2 (7.2)           | <b>0.30</b>                          |
| DLQI "effect on life", n (%)                       | n = 10                              | n = 101                        | <b>0.80</b>                          |
| 0-1: none                                          | 0 (0.0)                             | 15 (14.9)                      |                                      |
| 2-5: small                                         | 1 (10.0)                            | 22 (21.8)                      |                                      |
| 6-10: moderate                                     | 5 (50.0)                            | 25 (24.8)                      |                                      |
| 11-20: very large                                  | 3 (30.0)                            | 29 (28.7)                      |                                      |
| 21-30: extremely large                             | 1 (10.0)                            | 10 (9.9)                       |                                      |
| EQ-5D VAS (0-100), mean (SD)                       | 67.5 (14.6)                         | 63.6 (22.7)                    | <b>0.21</b>                          |
| ED-5D-3L categorical domains, n (%) <sup>d</sup>   |                                     |                                |                                      |
| Walking                                            | 5 (50.0)                            | 50 (49.5)                      | 0.01                                 |
| Self-care                                          | 1 (10.0)                            | 21 (21.0)                      | <b>0.31</b>                          |
| Usual activities                                   | 7 (70.0)                            | 50 (49.5)                      | <b>0.43</b>                          |
| Pain and discomfort                                | 7 (70.0)                            | 79 (78.2)                      | <b>0.19</b>                          |
| Anxiety and depression                             | 3 (30.0)                            | 40 (40.0)                      | <b>0.21</b>                          |
| Problems with sleeping                             | 2 (20.0)                            | 30 (29.4)                      | <b>0.22</b>                          |

<sup>a</sup> Not all patients provided responses to all patient-reported outcomes; item non-response was <2% for all cells, unless denominator is reported. Note that the three WPAI summary scores related to working are applicable only to those who are currently employed.

<sup>b</sup> Biologic medications included adalimumab, brodalumab, certolizumab pegol, etanercept, guselkumab, infliximab, ixekizumab, secukinumab, and ustekinumab.

<sup>c</sup> Meaningful differences (standardized difference >0.10) are bolded.

<sup>d</sup> Percentage of patients reporting at least some problem.

Abbreviations: DLQI = Dermatology Life Quality Index; EQ-5D = EuroQoL-5 dimensions; EQ-5D-3L = EuroQoL-5 dimensions, 3 levels; PsA = psoriatic arthritis; PsO = psoriasis; SD = standard deviation; VAS = visual analog scale.
